# Supplementary material for: In situ polymerization of ethylenedioxythiophene from sulfonated carbon nanotube templates: toward high efficiency ITO-free solar cells
Source: Royal Society of Chemistry journal article supplement (doi:10.1039/c6ta00287k), 2016-01-01
Supplement: c6ta00287k1.pdf [file c6ta00287k1.pdf]

## Supporting information

### In Situ Polymerization of Ethylenedioxythiophene from Sulfonated Carbon Nanotube Templates: Toward High Efficiency ITO-Free Solar Cells

Xiaotian Hu<sup>a</sup>, Lie Chen<sup>a,b</sup>, Licheng Tan<sup>a,b</sup>, Ting Ji<sup>a</sup>, Yong Zhang<sup>a</sup>, Lin Zhang<sup>a</sup>, Di Zhang<sup>c</sup>, Yiwang Chen<sup>\*a,b</sup>

<sup>a</sup>College of Chemistry/Institute of Polymers, Nanchang University, 999 Xuefu Avenue, Nanchang 330031, China

<sup>b</sup>Jiangxi Provincial Key Laboratory of New Energy Chemistry, Nanchang University, 999 Xuefu Avenue, Nanchang 330031, China

<sup>c</sup>School of Materials Science and Engineering, Shanghai Jiao Tong University, 800 Dongchuan Road, Shanghai 200240, China

Corresponding author. Tel.: +86 791 83968703; fax: +86 791 83969561. E-mail: ywchen@ncu.edu.cn (Y. Chen)

Author contributions. X. Hu and L. Chen contributed equally to this work.

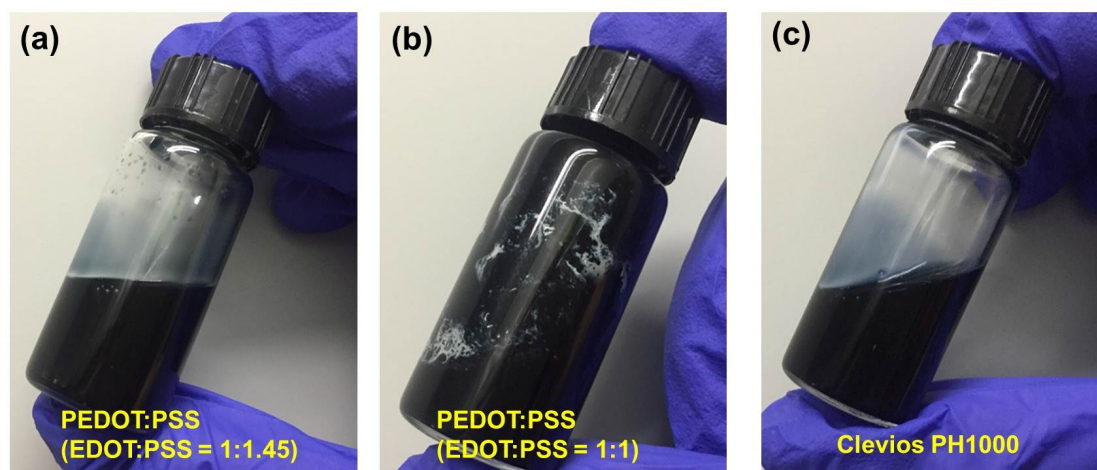

**Figure S1.** The photographs of home-made PEDOT:PSS via different PSS ratio and Clevios PH1000.

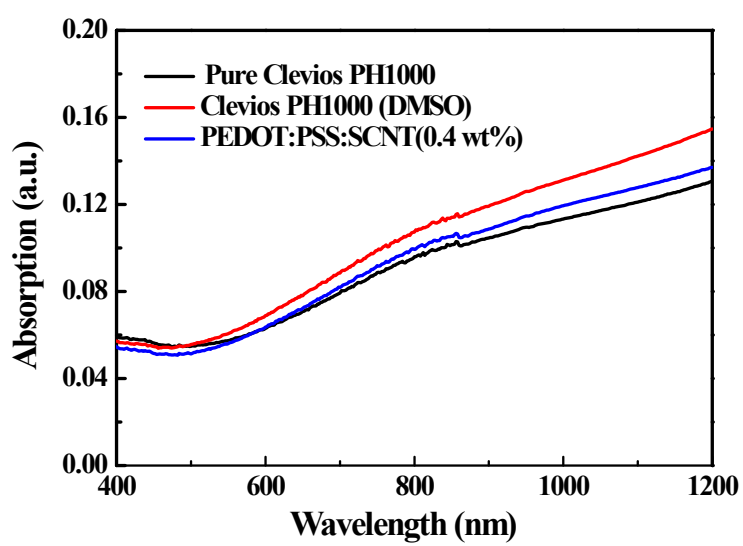

**Figure S2.** The absorption spectra of different PEDOT:PSS hybrid films (~70 nm) in the range from 400 nm to 1200 nm.

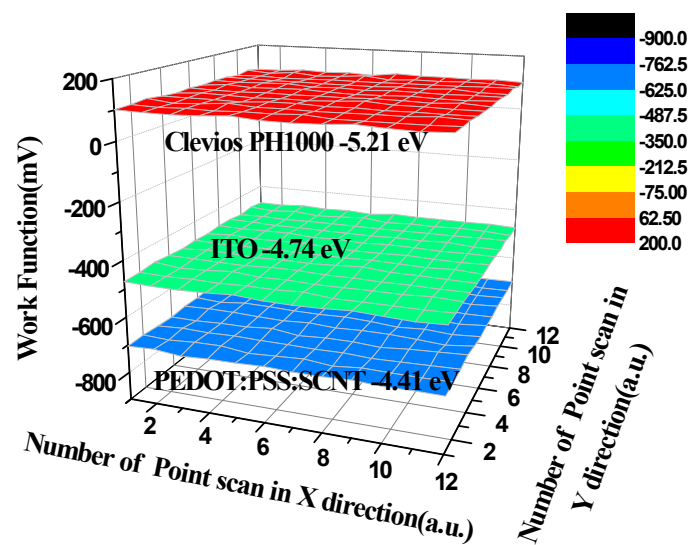

The work functions of the modified cathode were investigated using a Kelvin probe (KP 6500 Digital Kelvin probe, McAllister Technical Services. Co., Ltd.). The samples were measured in a conditioned chamber where the  $O_2$  level is  $< 25$  ppm. The electronic work functions gap between the samples and standard gold probe shown in **Figure S3**. The actual work function of the samples can be obtained through the equation:

$$WF = WF_0 + \Delta WF$$

Where  $WF$  is the sample work function,  $WF_0$  is standard gold probe work function (5.1 eV), and  $\Delta WF$  is the work function gap between samples and standard gold.

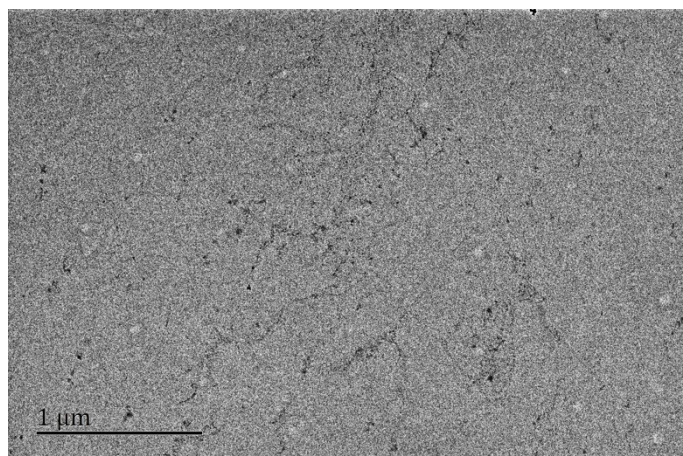

**Figure S4.** The Transmission Electron Microscope (TEM) image of SCNT.
